# Supplementary material for: Anti-Multiple Myeloma Potential of Secondary Metabolites from Hibiscus sabdariffa
Source: PubMed Central journal article supplement (PMC6651714; doi:10.3390/molecules24132500), 2019-07-09
Supplement: molecules-24-02500-s001.pdf [file molecules-24-02500-s001.pdf]

## SUPPLEMENTARY MATERIAL

# Anti-Multiple Myeloma Potential of Secondary Metabolites from *Hibiscus sabdariffa*

Alessio Malacrida <sup>1,2,†</sup>, Valeria Cavalloro <sup>3,†</sup>, Emanuela Martino <sup>3,\*</sup>, Arianna Cassetti <sup>4</sup>, Gabriella Nicolini <sup>1,2</sup>, Roberta Rigolio <sup>1,2</sup>, Guido Cavaletti <sup>1,2</sup>, Barbara Mannucci <sup>5</sup>, Francesca Vasile <sup>6</sup>, Marcello Di Giacomo <sup>7</sup>, Simona Collina <sup>7,\*</sup> and Mariarosaria Miloso <sup>1,2,\*</sup>

<sup>1</sup> School of Medicine and Surgery, University of Milan-Bicocca, 20900 Monza, Italy; alessio.malacrida@unimib.it (A.M.); gabriella.nicolini@unimib.it (G.N.); roberta.rigolio@unimib.it (R.R.); guido.cavaletti@unimib.it (G.C.)

<sup>2</sup> Experimental Neurology Unit, University of Milano-Bicocca, 20900 Monza, Italy

<sup>3</sup> Department of Earth and Environmental Sciences, University of Pavia, 27100 Pavia, Italy; valeria.cavalloro01@universitadipavia.it

<sup>4</sup> CREA, Research Centre for Vegetable and Ornamental Crops, 18038 Sanremo, Italy; arianna.cassetti@CREA.gov.it

<sup>5</sup> Center of Large Equipment, University of Pavia, 27100 Pavia, Italy; barbara.mannucci@unipv.it

<sup>6</sup> Department of Chemistry, University of Milan, 20133 Milano, Italy; francesca.vasile@unimi.it

<sup>7</sup> Department of Drug Sciences, University of Pavia, 27100 Pavia, Italy; marcello.digiacommo@unipv.it

\* Correspondence: emanuela.martino@unipv.it (E.M.); simona.collina@unipv.it (S.C.); mariarosaria.miloso@unimib.it (M.M.); Tel.: +39-0382-986810 (E.M.); +39-0382-987379 (S.C.); +39-0264-488123 (M.M.)

† Authors contributed equally to this work

## S1. Chromatographic characterization of the extracts

Metabolites contents of HsEE and Fractions A-D were characterized *via* HPLC-UV/PAD-ESI-MS/MS analysis. Their chromatographic profiles and the MS associated to the peaks (total ion content) are below reported (Figure S1, Table S1). We also report the MS/MS spectra of the main peaks present in the chromatographic profile (Figure S2)

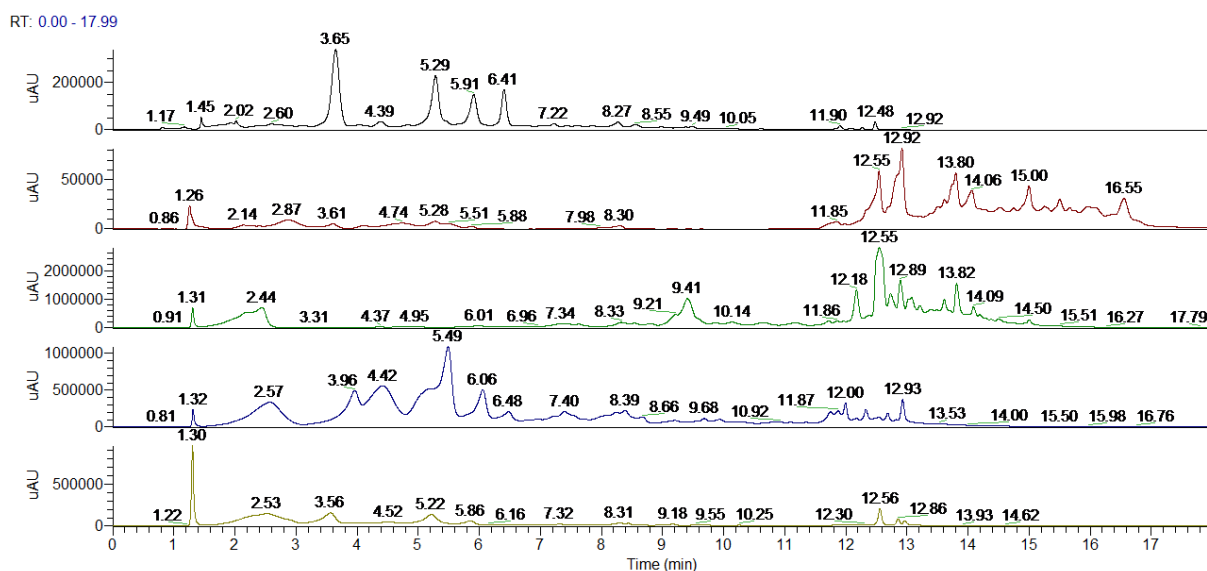

**Figure S1.** HPLC-UV profile recorded at  $\lambda = 325$  nm of HsEE (black line), HsF A (red line), HsF B (green line), HsF C (blue line) and HsF D (yellow line).

**Table S1.** Main peaks of HsEE and HsF A-D.

|    | Rt (min) |       |       |       |       | m/z<br>negative ion | m/z<br>daughter<br>ion | compound                           |
|----|----------|-------|-------|-------|-------|---------------------|------------------------|------------------------------------|
|    | HsEE     | A     | B     | C     | D     |                     |                        |                                    |
| 1  | 1,98     | -     | -     | -     | 1,94  | 189                 | 127                    | Hibiscus acid                      |
| 2  | 2,60     | -     | -     | 2,57  | 2,53  | 203                 | 185                    | Hibiscus acid 6-methyl ester       |
| 3  | 3,65     | -     | -     | 3,96  | 3,56  | 353                 | nd                     | 3-Caffeoylquinic acid <sup>b</sup> |
| 4  | 5,29     | -     | -     | 5,49  | 5,22  | 353                 | nd                     | 5-CQA <sup>a</sup>                 |
| 5  | 5,91     | -     | -     | 6,06  | -     | 353                 | nd                     | 4-Caffeoylquinic acid <sup>b</sup> |
| 6  | 6,41     | -     | -     | 6,48  | -     | 179                 | nd                     | Caffeic acid                       |
| 7  | -        | -     | 9,41  | -     | -     | 293                 | 179                    | Caffeic acid derived               |
| 8  | -        | 12,18 | -     | -     | -     | 312                 | nd                     | Unknown                            |
| 9  | -        | 12,55 | 12,55 | 12,55 | 12,56 | 312                 | nd                     | Unknown                            |
| 10 | -        | 12,92 | 12,89 | 12,93 | 12,86 | 393                 | nd                     | Unknown                            |
| 11 | -        | 13,80 | 13,82 | -     | -     | 669                 | nd                     | Unknown                            |
| 12 | -        | 15:00 | -     | -     | -     | 371                 | nd                     | Unknown                            |
| 13 | -        | 15:50 | -     | -     | -     | 721                 | nd                     | Dp-samb monoester <sup>b</sup>     |

<sup>a</sup>Confirmed with authentic standard. <sup>b</sup>Tentatively identified

ibiscus003 #127-175 RT: 1.64-2.15 AV: 16 NL: 1.02E4  
F: ITMS - c ESI d Full ms2 188.98@cid35.00 [50.00]

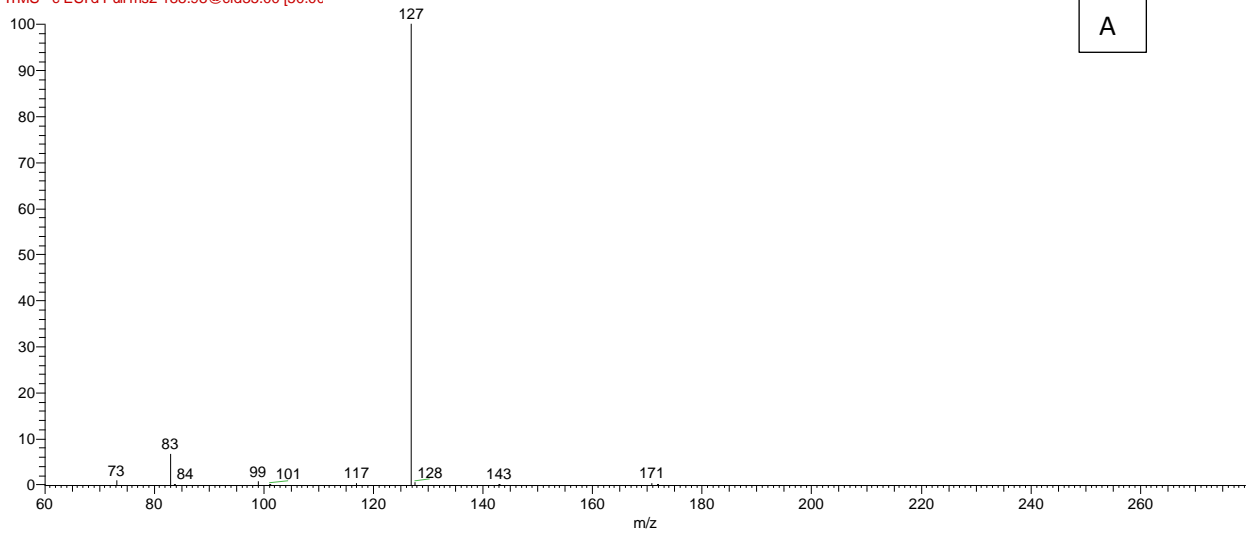

A

ibiscus003 #237 RT: 2.95 AV: 1 NL: 6.56E1  
F: ITMS - c ESI d Full ms2 203.02@cid35.00 [50.00]

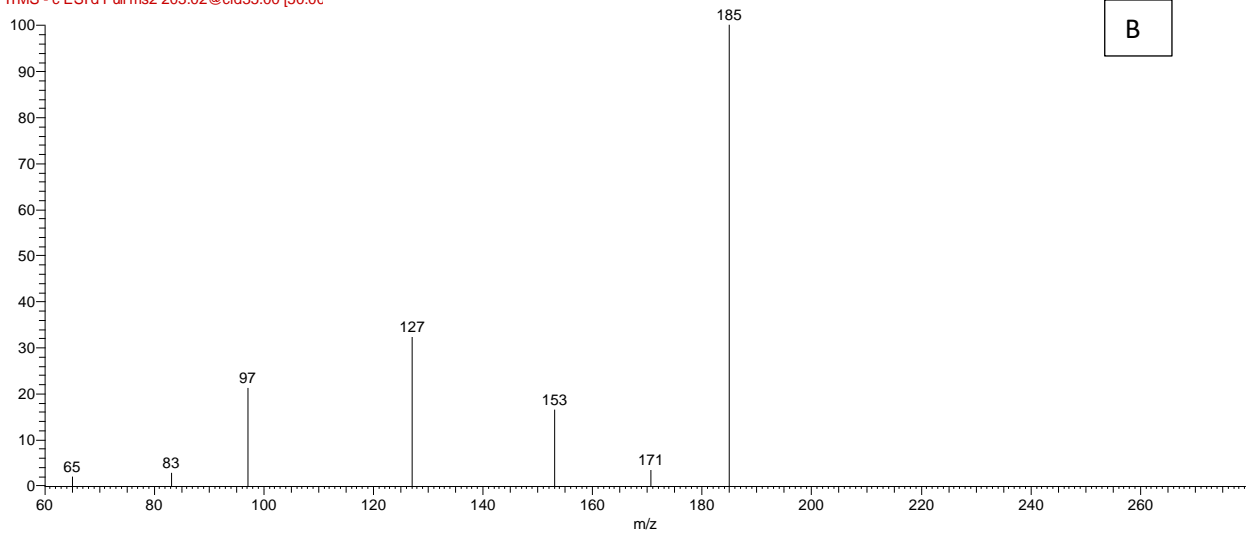

B

ibiscus008 #741-760 RT: 9.77-9.98 AV: 6 NL: 9.97  
F: ITMS - c ESI d Full ms2 292.99@cid35.00 [70.00]

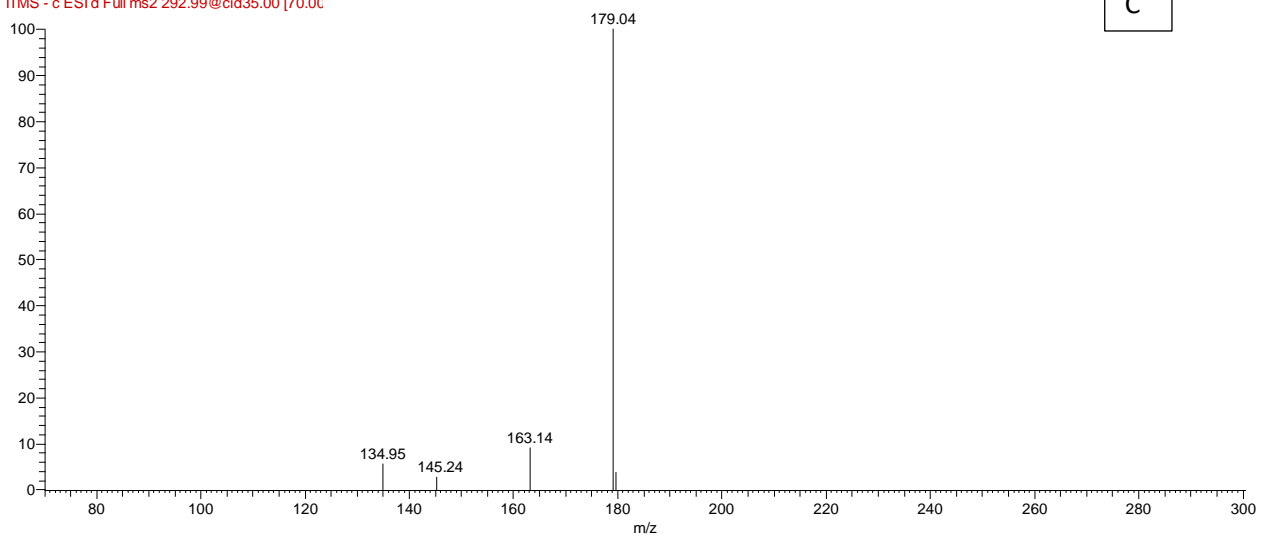

C

**Figure S2:** MS/MS spectrum m/z293 Hibiscus acid (Rt 1.98; A); Hibiscus acid 6-methyl ester (Rt 2.53; B); Caffeic acid derived (Rt 9.41; C)

## S2. Secondary metabolites identification

Hibiscus acid dimethyl ester is a white solid, melting point: 124.3°C

- NMR analysis of hibiscus acid dimethyl ester:

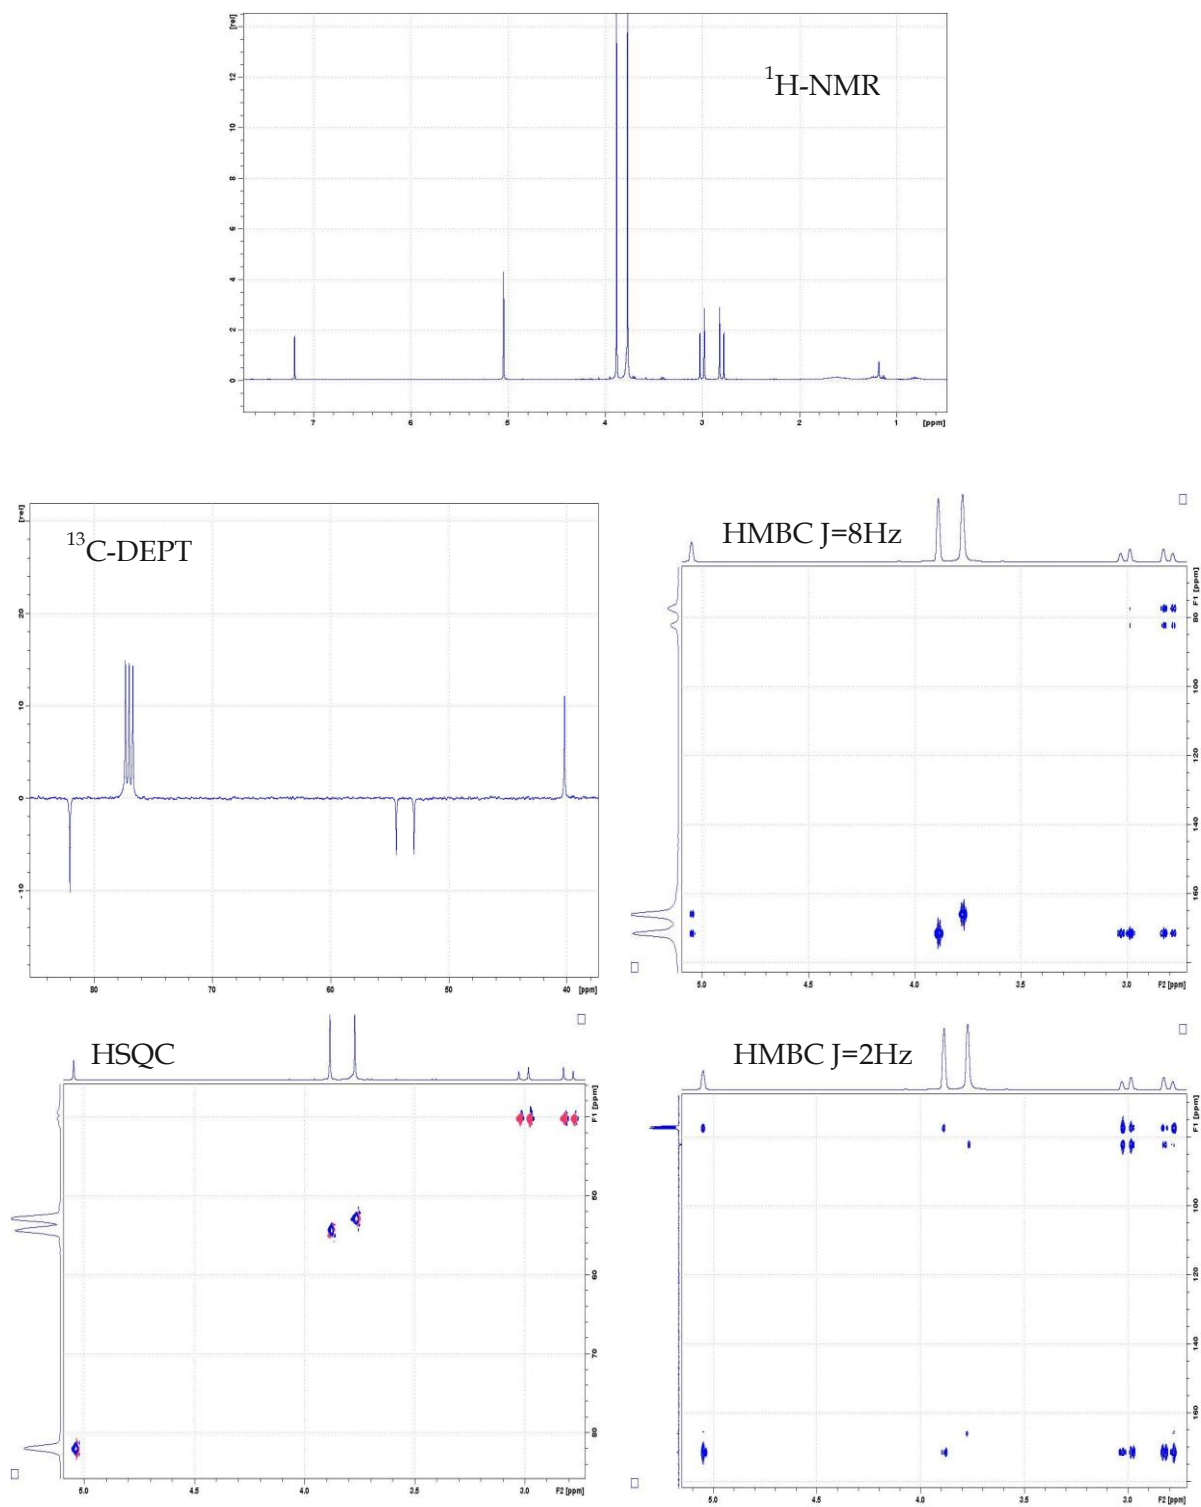

Figure S3. NMR analysis of *Hib-ester*

- IR analysis of hibiscus acid dimethyl ester:

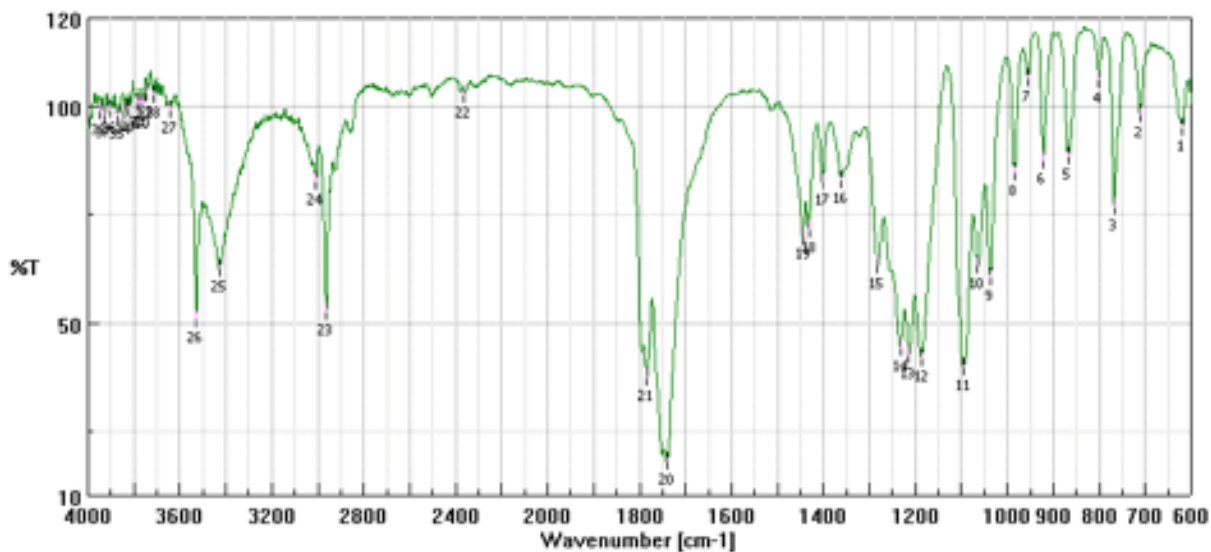

**Figure S4.** IR analysis of *Hib-ester*

| Wavenumber [cm-1] | %T      |         |         |         |
|-------------------|---------|---------|---------|---------|
| 619.038           | 94.8529 | 1064.51 | 62.9806 | 1444.42 |
| 69.8627           |         |         |         |         |
| 711.604           | 97.882  | 1096.33 | 39.7184 | 1740.44 |
| 17.7719           |         |         |         |         |
| 767.53            | 76.5661 | 1186.97 | 41.8091 | 1783.83 |
| 37.0691           |         |         |         |         |
| 801.278           | 105.825 | 1213.97 | 42.5542 | 2363.34 |
| 102.538           |         |         |         |         |
| 866.846           | 88.2895 | 1233.25 | 44.2167 | 2963.09 |
| 52.2969           |         |         |         |         |
| 921.807           | 87.395  | 1282.43 | 63.1368 | 3008.41 |
| 82.3486           |         |         |         |         |
| 955.555           | 106.083 | 1361.5  | 82.86   | 3429.78 |
| 62.4903           |         |         |         |         |
| 984.482           | 84.3889 | 1402    | 82.2685 | 3529.09 |
| 50.8291           |         |         |         |         |
| 1036.55           | 60.291  | 1431.89 | 71.4603 | 3641.91 |
| 99.002            |         |         |         |         |

- MS analysis of hibiscus acid dimethyl ester:

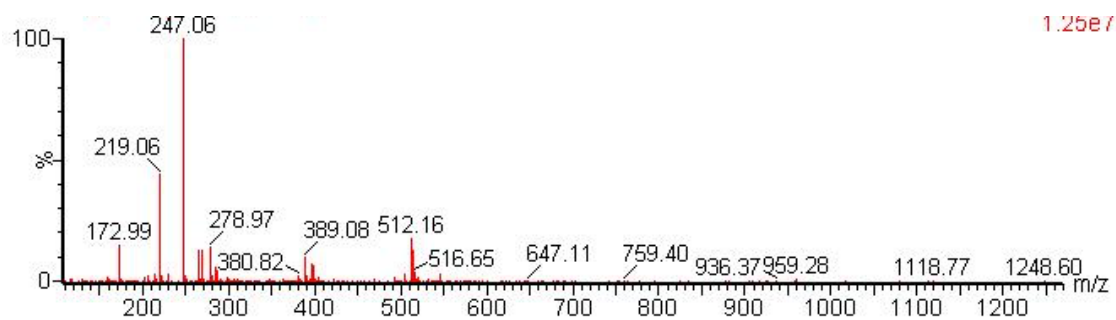

**Figure S5.** MS analysis of *Hib-ester*

5-hydroxy-2*H*-pyran-6-carbaldehyde (*Hib-carbaldehyde*) appears like a yellow oil.

- NMR analysis of 5-hydroxy-2*H*-pyran-6-carbaldehyde:

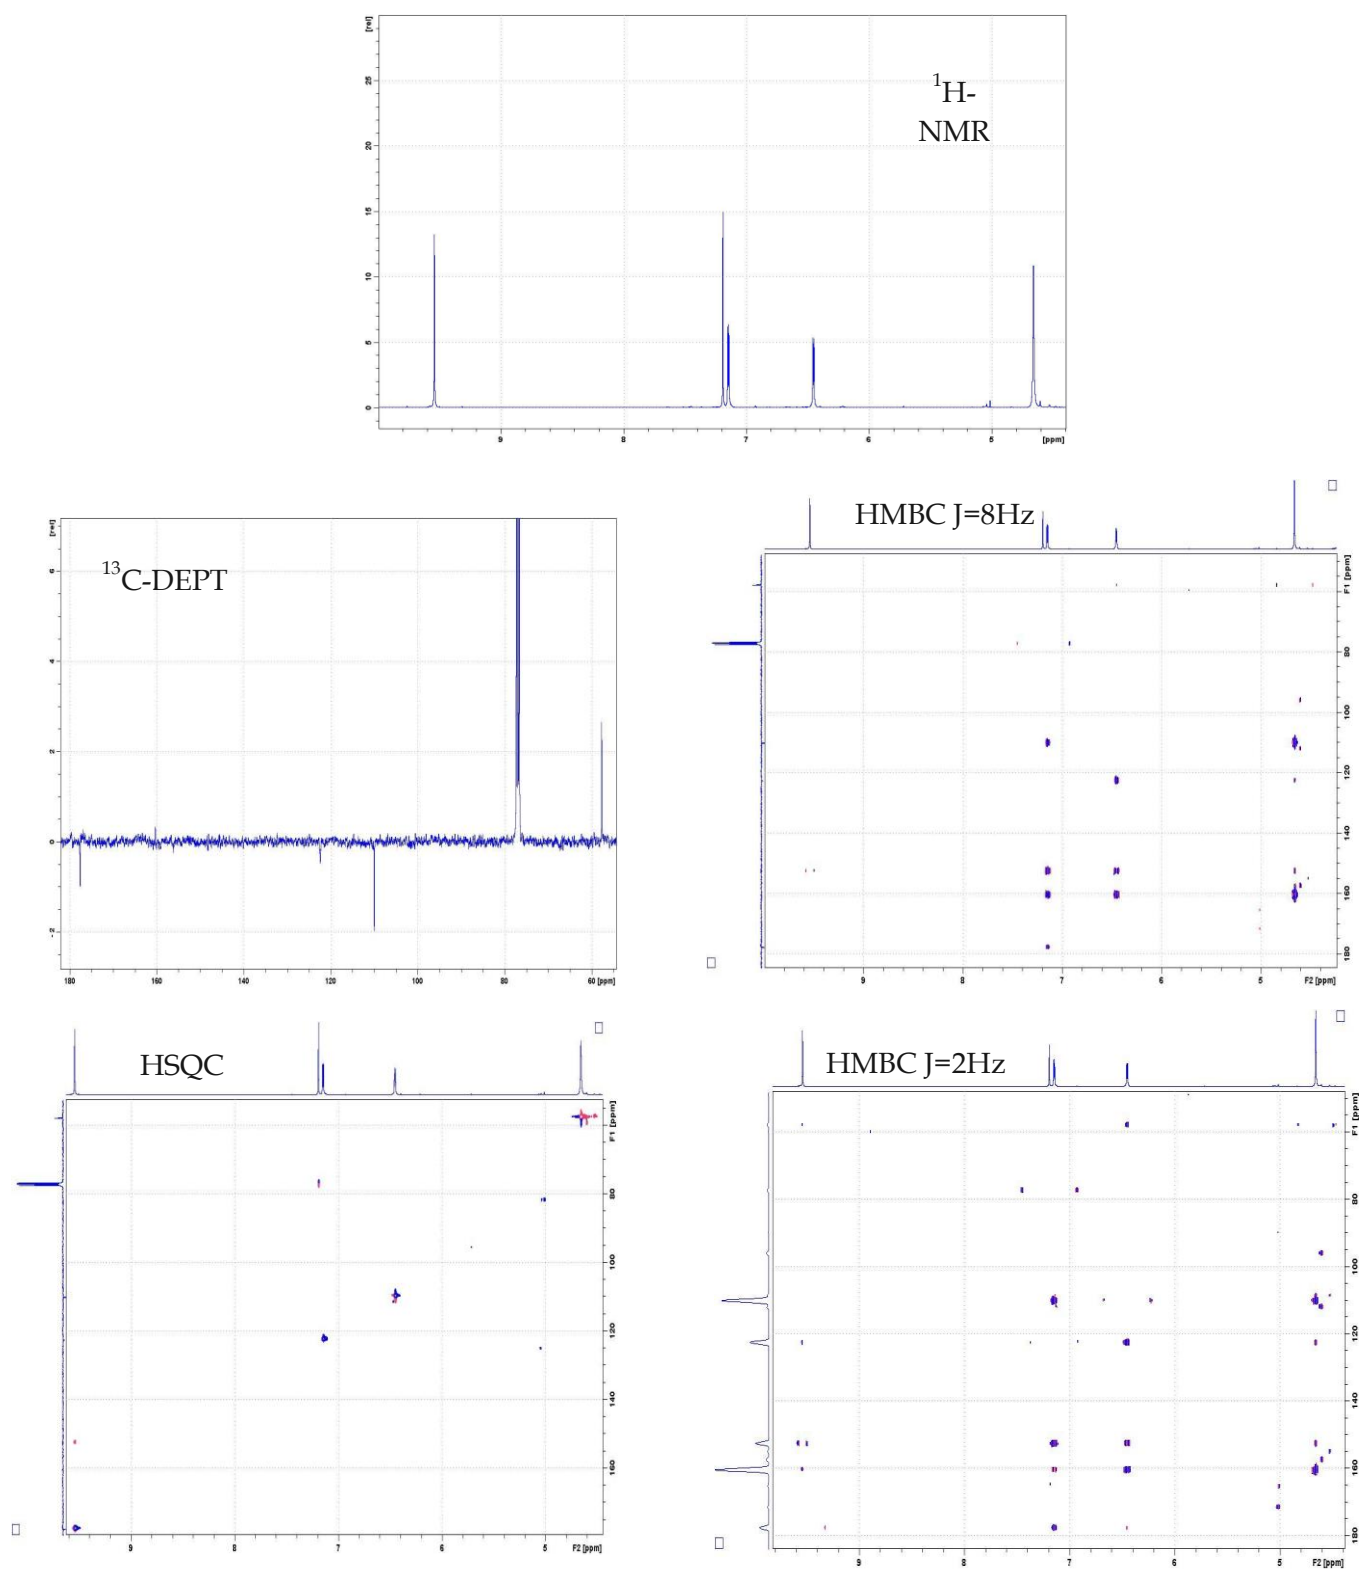

**Figure S6.** NMR analysis of *Hib-carbaldehyde*

- MS analysis of 5-hydroxy-2H-pyran-6-carbaldehyde:

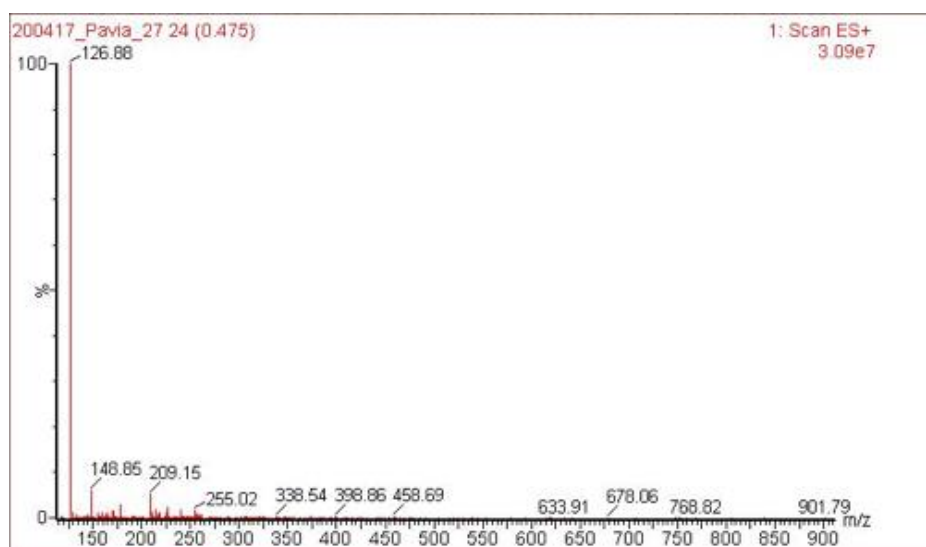

Figure S7 MS analysis of *Hib*- carbaldehyde



### S3. Neurite outgrowth after treatment with the isolated *Hib- ester* and *Hib- carbaldehyde*

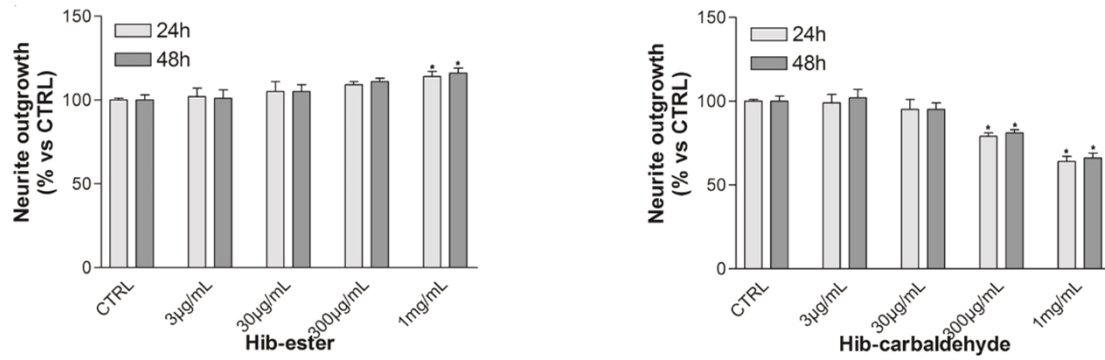

**Figure S8** Neurite outgrowth from DRG treated with *Hib-ester* (3 μg/ml – 1 mg/ml) for 24 and 48h and with *Hib-carbaldehyde* (3 μg/ml – 1 mg/ml) for 24 and 48h. Untreated cells (CTRL) are control. Graph represent the mean ± SD of three independent experiments (\* P<0.05, \*\* P<0.01 vs CTRL).
